# Supplementary material
Source: publisher site journal article supplement (https://www.dovepress.com/article/568452)
Supplement: Supplementary file 1 [file 568452%20Supplementary%20Material.docx]

**Sample size calculation**

Based on the report titled “Postoperative delirium risk in patients with hyperlipidemia: A prospective cohort study” published by our team members, Zhao et al., 1 in the *Journal of Clinical Anesthesiology*, the incidence of postoperative delirium in patients with hyperlipidemia was 21.6%. We set the postoperative delirium incidence rate for the remimazolam group at 13.5%. With a significance level of α=0.05 (two-tailed) and statistical power of 1-β=0.90, the pwr package in R software was used to perform a two-proportion test for sample size calculation. Considering an estimated 15% loss to follow-up or dropout rate, a minimum required sample size of 1,078 cases was ultimately determined to be required for this study.

**Supplementary Table 1. Target trial components and emulation of remimazolam use and postoperative delirium (POD)**

| Protocol Component | Target trial protocol | Target trial emulation |
| --- | --- | --- |
| Eligibility criteria | Inclusion criteria: hyperlipidemia; age ≥18 years undergoing surgery under general anesthesia; American Society of Anesthesiologists (ASA) grade I–III; consent to study participation and signing of informed consent.  Exclusion criteria: preoperative delirium or psychiatric disease; allergy or contraindication to benzodiazepines; severe cardiovascular disease or hepatic or renal insufficiency; a history of drug abuse or taking psychotropic drugs. | Same as the target trial. |
| Treatment strategies | Remimazolam group: patients received remimazolam during general anesthesia (both induction and maintenance phases).  Non-remimazolam group: patients did not receive remimazolam during general anesthesia. | Same as the target trial. |
| Assignment procedures | Participants were randomly assigned to either the remimazolam or non-remimazolam group prior to general anesthesia. | Confounding variables were controlled for using the Targeted Maximum Likelihood Estimation model to mimic the effect of grouping in a randomized controlled trial. |
| Follow-up period | Participants were followed up preoperatively and on days 1, 2, and 3 postoperatively, in person or via case study, to assess consciousness and cognitive status. Participants were followed up by telephone at 3 and 6 months postoperatively to assess cognitive function and mortality. | Same as the target trial. |
| Outcomes | Primary outcome: POD  Secondary outcomes: length of hospital and PACU stays, severity of POD, incidence of cognitive impairment at 3 and 6 months postoperatively, and all-cause mortality at 6 months postoperatively. | Same as the target trial. |
| Causal contrasts | Intended treatment effect | Observational modelling of intentional treatment effects. |
| Analysis plan | Intention-to-treat analysis | Similar to the intention-to-treat analysis, except that the estimates were adjusted for baseline covariates. Additional sensitivity analyses were performed. |

**Supplementary Table 2. Interaction effect test**

| Postoperative Delirium | β | Standard Error | t Value | P for interaction |
| --- | --- | --- | --- | --- |
| Arrhythmia × total dose of remimazolam* | -0.002 | 0.001 | -2.455 | 0.014 |
| Intraoperative hypertension × total dose of remimazolam* | 0.001 | 0.002 | 0.469 | 0.639 |
| BMI × total dose of remimazolam* | -0.000 | 0.000 | -0.944 | 0.346 |
| Surgical time × total dose of remimazolam* | -0.000 | 0.000 | -1.842 | 0.066 |

**Notes:** *Multivariate logistic regression models are used for the analyses, with the inclusion of an interaction term for arrhythmia × total remimazolam dose; intraoperative hypertension × total remimazolam dose; body mass index × total remimazolam dose; duration of surgery × total remimazolam dose; and adjustment for confounders, including hypertension, diabetes, coronary heart disease, education level, age, intraoperative hypothermia, intraoperative hypotension, delayed awakening, and alcohol dependence.

| **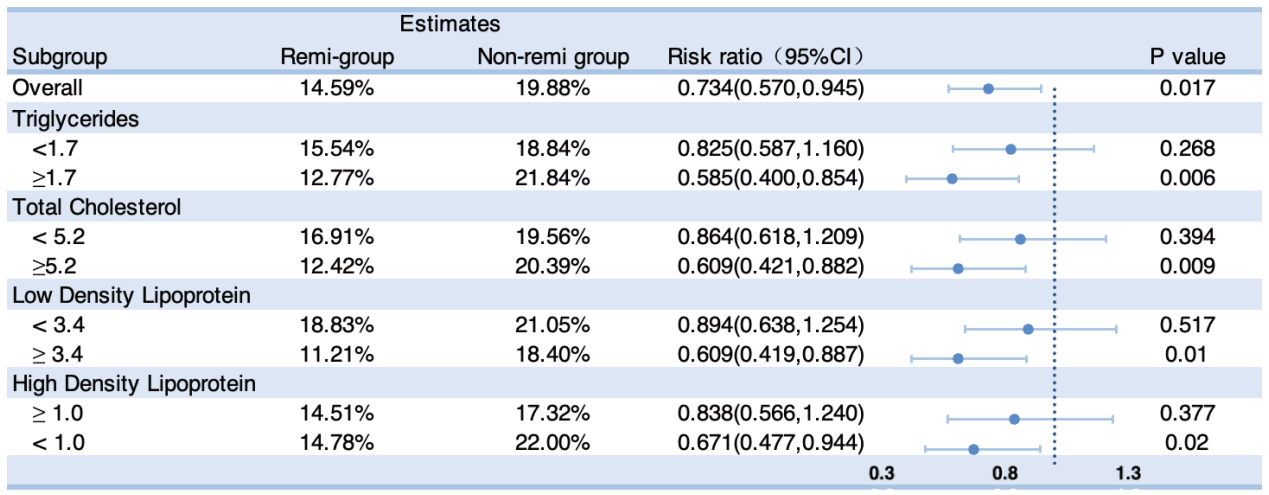** |
| --- |
| **Supplementary Figure 1. Target trial emulation subgroup analysis.** The lipid protein grouping criteria are based on the appropriate lipid levels for low-risk populations in atherosclerotic cardiovascular disease primary prevention, as outlined in the Chinese Lipid Management Guidelines (2023) by the Joint Expert Committee on the Revision of the Chinese Lipid Management Guidelines. |

| 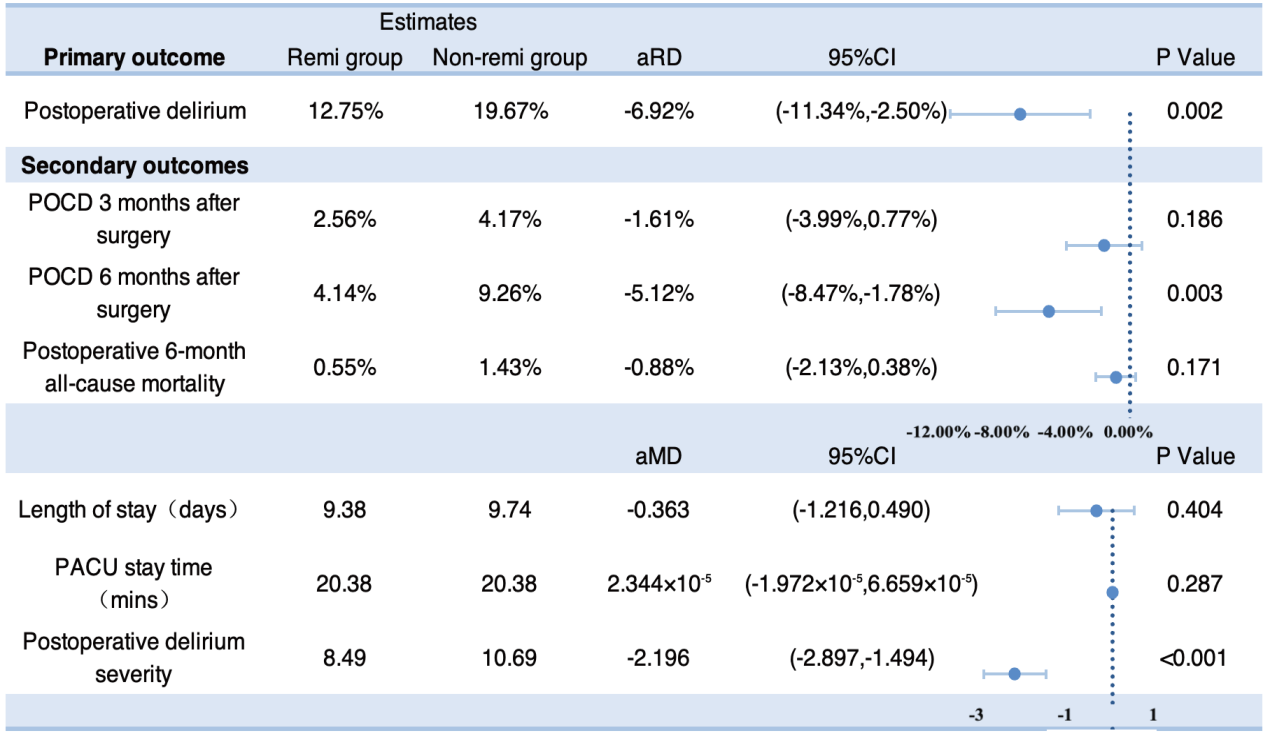 |
| --- |
| **Supplementary Figure 2. Emulated sensitivity analysis of the target trial.** The analysis is performed after exclusion of patients with preoperative presence of cerebrovascular disease (n=981), and the results are consistent with those o the main analysis, and the statistical significance remains unchanged. |

**Reference**

1. Zhao Y, Zhong K, Zheng Y, et al. Postoperative delirium risk in patients with hyperlipidemia: A prospective cohort study*. J Clin Anesth*. 2024;98:111573. doi:10.1016/j.jclinane.2024.11157
